# Supplementary material
Source: PubMed Central journal article supplement (PMC7185785)
Supplement: mmc1.pdf [file mmc1.pdf]

# THE LANCET Infectious Diseases

## Supplementary webappendix

This webappendix formed part of the original submission and has been peer reviewed. We post it as supplied by the authors.

Supplement to: Liu y, Chan T-C, Yap L-W, et al. Resurgence of scarlet fever in China: a 13-year population-based surveillance study. *Lancet Infect Dis* 2018; published online May 29. [http://dx.doi.org/10.1016/S1473-3099\(18\)30231-7](http://dx.doi.org/10.1016/S1473-3099(18)30231-7).

# Supplementary Web Appendix

## **Supplement 1: Diagnostic Criteria for Scarlet Fever Issued by Ministry of Health, People's Republic of China released on February 28, 2008 (WS 282-2008)**

### **1 Scope**

This standard specifies the diagnostic basis, diagnostic principles, diagnosis and differential diagnosis for scarlet fever.

This standard applies to nationwide medical institutions and their staff to diagnose and report scarlet fever.

### **2 Terms and definitions**

The following terms and definitions apply to this standard.

#### **2.1 White strawberry tongue**

The tongue has a white coating on it, while the papillae of the tongue are swollen and reddened, standing out on the white coating, making the tongue resemble a strawberry.

#### **2.2 Red strawberry tongue**

White strawberry tongue following the desquamating process, or the shedding of the tissue which created the white coating) the whiteness disappears while the red and enlarged papillae give it the "red strawberry" appearance.

#### **2.3 Pastia's lines**

Lines of petechiae which appear as pink/red areas located in arm pits and elbow pits.

#### **2.4 Circumoral pallor**

Obvious facial hyperemia compared to hyperemia of the nose and mouth, appearing to be white.

### **3 Diagnostic basis**

#### **3.1 Epidemiology history**

Local occurrence and prevalence of the disease, with exposure to scarlet fever patients or to tonsillitis, angina, otitis media, erysipelas or other streptococcal infected patients.

#### **3.2 Clinical manifestations**

##### **3.2.1 Common scarlet fever**

Abrupt onset with fever, angina, and rash. Rash is observed on the second day of fever; the skin has disseminated hyperemia and flushing, among which congestive rash as small as a needle's point can be seen that fades with pressing, accompanied by itching. A small number of patients can have a rash with yellow-white pustules, which do not break easily. Pastia's lines may form on skin creases. Facial hyperemia emerges without rash, accompanied by "circumoral pallor". In early onset of the disease, "white strawberry tongue" is seen and is more severe toward the edge of the tongue. After 2-3 days the white coating begins to fall off, forming a "red strawberry tongue". After 2-5 days the rash subsides, after which the skin has desquamation or furfur.

##### **3.2.2 Mild scarlet fever**

Fever, angina and rash are mild and short of duration; desquamation is also mild.

### 3.2.3 Toxic type

The main clinical manifestation is toxemia, with obvious poisoning symptoms, like fever, headache, vomiting, hemorrhagic rash, confusion, etc. Angina is not severe. Toxic myocarditis, toxic hepatitis and septic shock can occur.

### 3.2.4 Sepsis type

Pharyngeal swelling with exudation of pus or even ulcers, causing cervical lymphadenitis, acute otitis media, acute sinusitis, etc. Can also cause sepsis.

### 3.2.5 Surgical and obstetric type

Pathogenic bacteria invade from the wound or birth canal. Local rash at first, which extends to the whole body with no pharyngitis. Systemic symptoms are mostly mild.

## **3.3 Laboratory testing**

3.3.1 The total number of leukocytes and neutrophils increases, with possible toxic granulation for severe patients.

3.3.2 Group A *Streptococcus* by rapid antigen detection is positive.

3.3.3 The result of bacteria identification is the  $\beta$  hemolytic streptococcus by bacterial culture and by microscopy.

3.3.4 The result of a bacitracin-sensitive test is positive.

3.3.5 The result of biochemical identification is *Streptococcus pyogenes*.

3.3.6 Throat swab or other focal secretion is identified as Group A  $\beta$  hemolytic streptococcus by bacteria serotyping.

## **4 Diagnostic principles**

Comprehensive diagnosis should be based on epidemiological data, clinical manifestations and laboratory tests. Confirmation must be based on etiological examination.

## **5 Diagnosis**

### **5.1 Probable cases**

Satisfying clinical manifestations in 3.2 and 3.3.1.

### **5.2 Clinical diagnosis of cases**

Meeting any of the following for diagnosis:

5.2.1 Probable cases satisfying 3.1.

5.2.2 Probable cases satisfying at least one of 3.3.2, 3.3.3, 3.3.4, or 3.3.5.

### **5.3 Confirmed cases**

Clinical diagnosis of cases satisfying 3.3.6.

## **Supplement 2: Introduction for the Joinpoint regression**

Joinpoint regression analysis is conducted with Joinpoint Regression Program version 4.5.0.1 (Statistical Research and Applications Branch, National Cancer Institute). Joinpoint regression analysis fits a series of joined linear models of the natural logarithm of annual incidence using calendar year as an independent variable [Kim HJ, Fay MP, Feuer EJ, Midthune DN. Permutation tests for Joinpoint regression with applications to cancer rates. *Stat Med* 2001; 28;20 (4):655], which is useful to describe changes in trend data. We allow a maximum of 2 joinpoints and use a permutation test to select the best-fitted model with the significance level of 0.05 and 4,499 randomly permuted data sets as suggested by the software. We report the segments with statistical significance ( $p < 0.05$ ) in table 1. In Jiangxi and Shaanxi, there are only some years with a significant surging trend during the studied period. The  $p$ -value for a two-sided test that the true annual percentage change is zero is calculated based on a  $t$  distribution, and the parametric method is used to calculate 95% CIs.

Supplement 3: Seasonal distribution of scarlet fever cases reported in 31 provinces of China during 2004 to 2016

(A) Northwest China

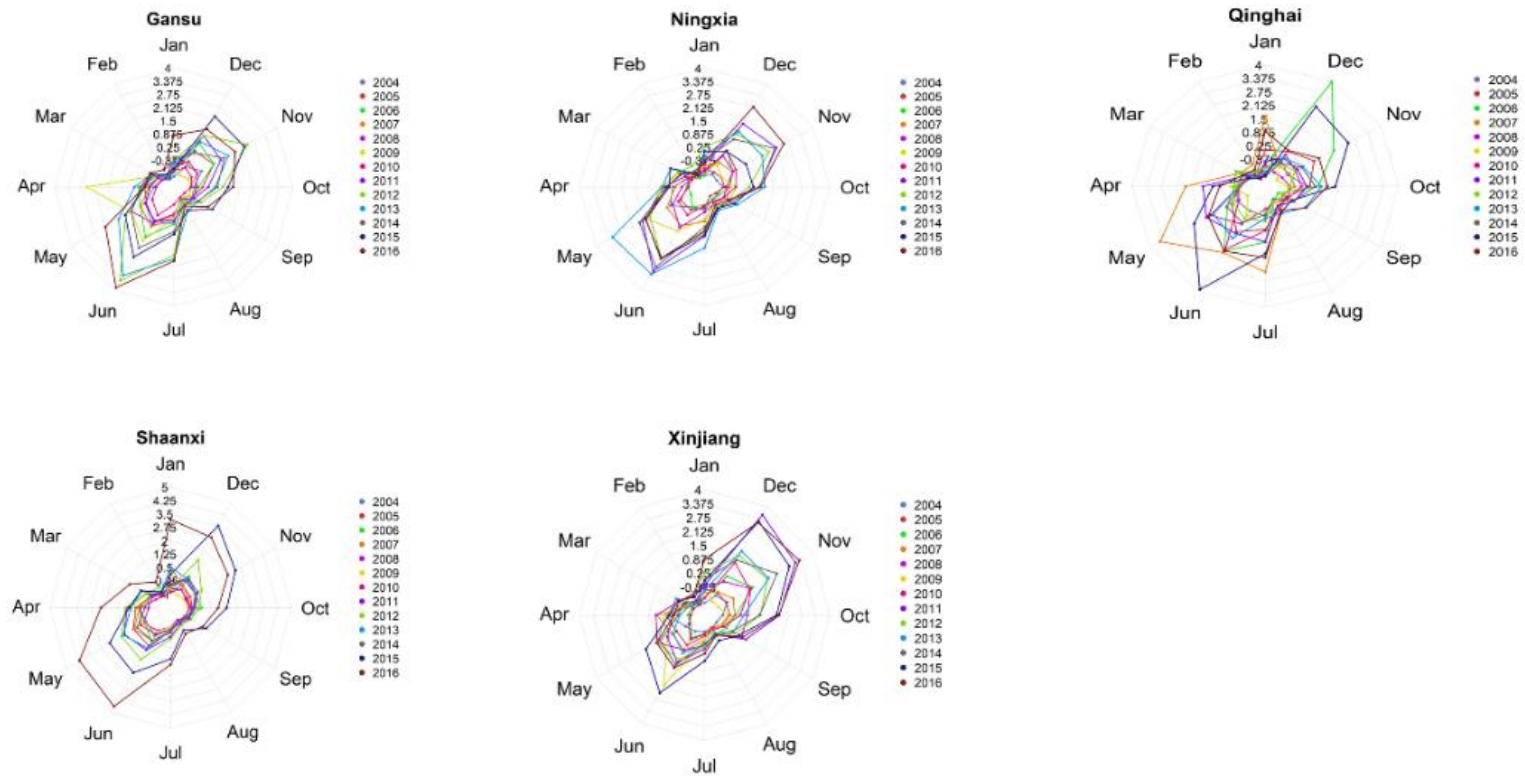

# (B) Northeast China

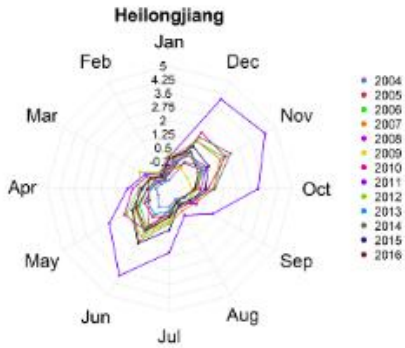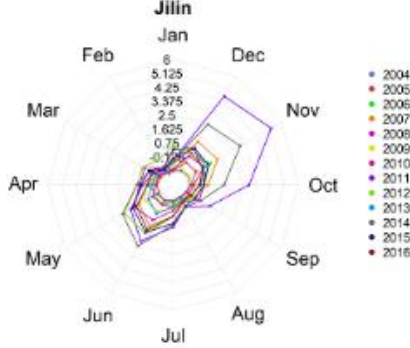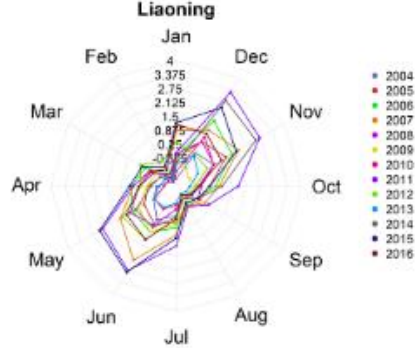



# (C) North China

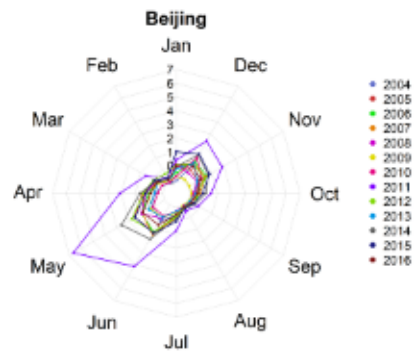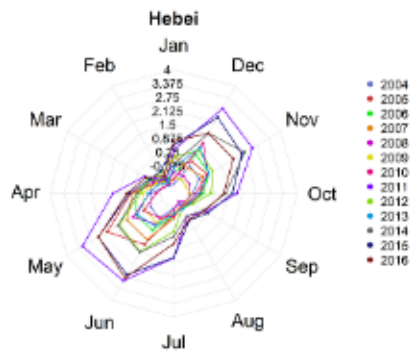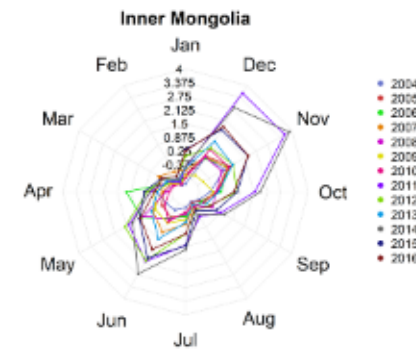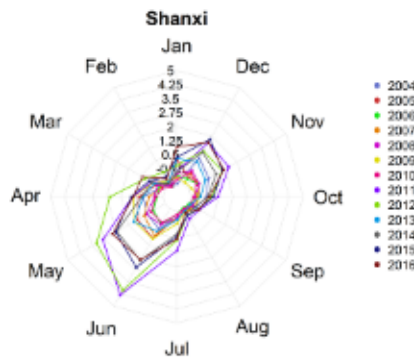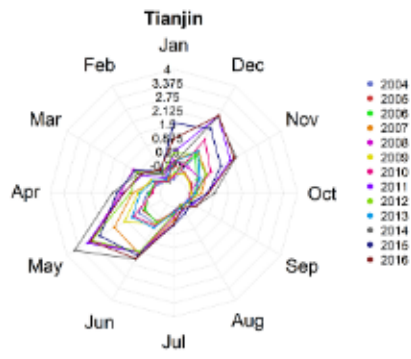

## (D) Central China

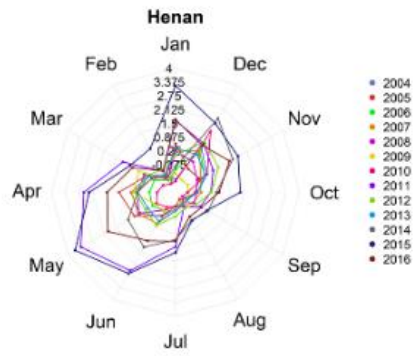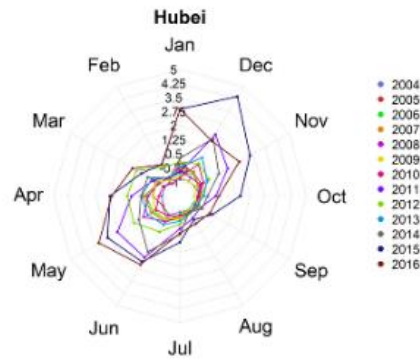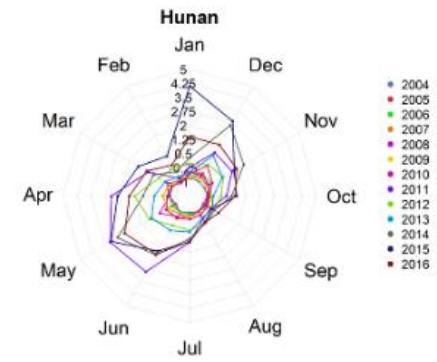

# (E) East China

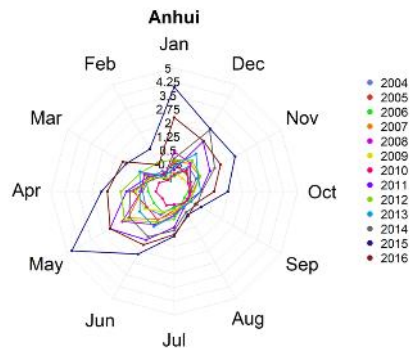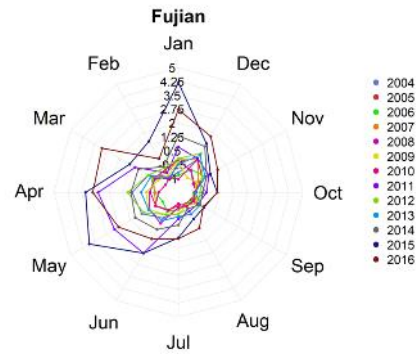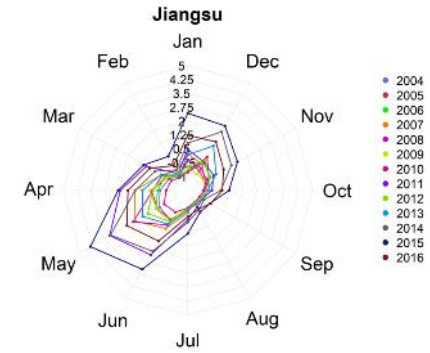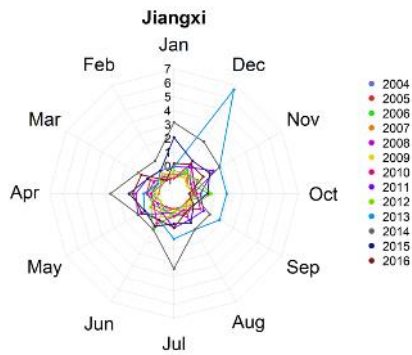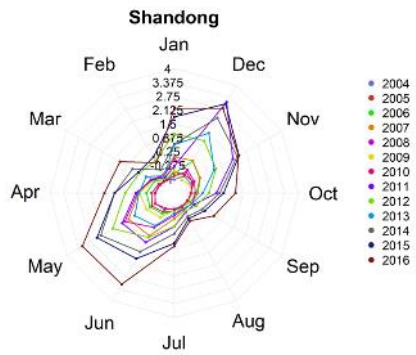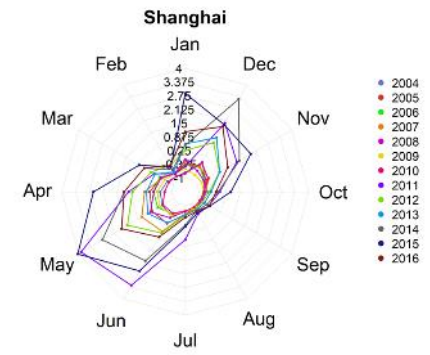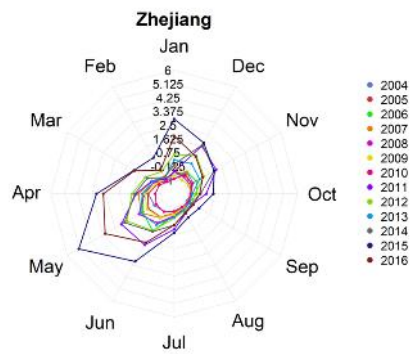

## (F) Southwest China

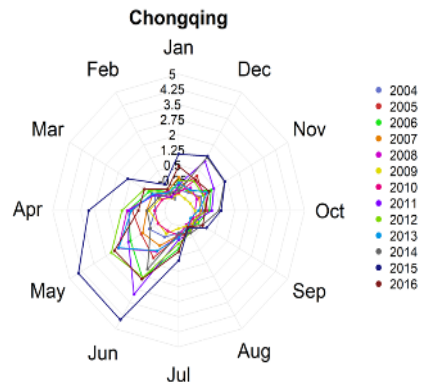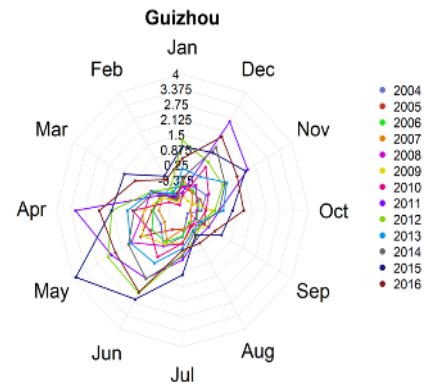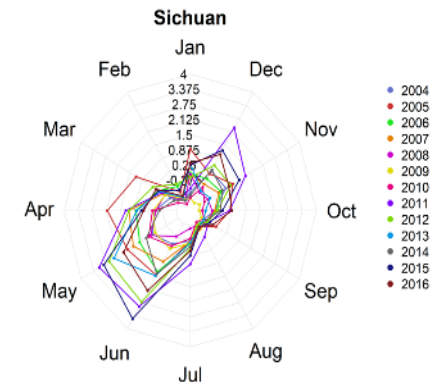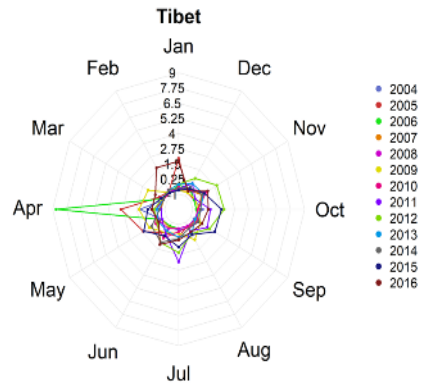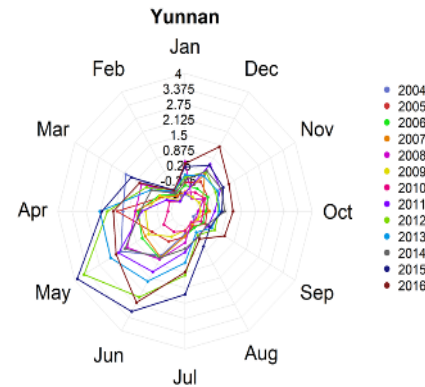

## (G) South China

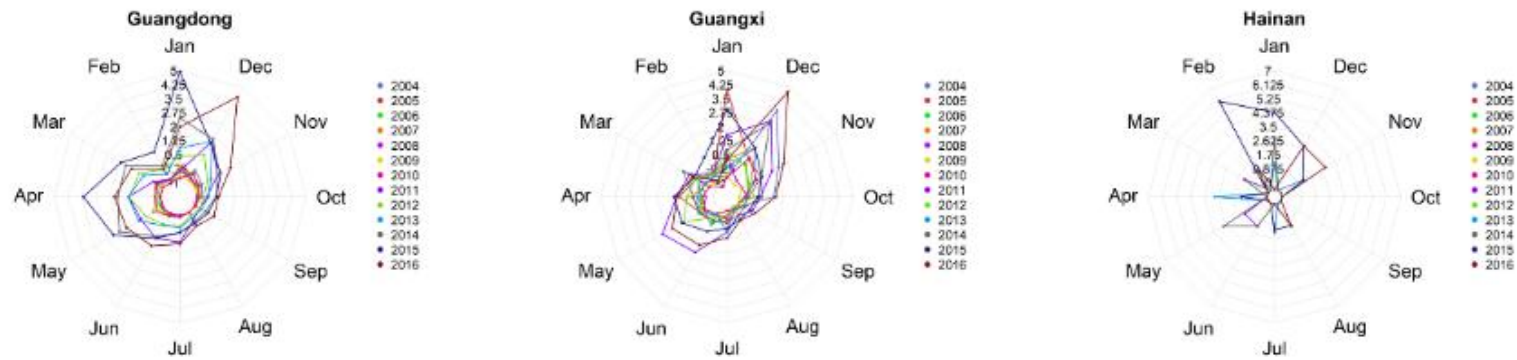

Notes: We standardized monthly incidences of scarlet fever for different areas, then applied a radar chart to display Z scores of incidence in each area by using R package fmsb (<https://cran.r-project.org/web/packages/fmsb/index.html>). There were 12 spikes in the radar chart representing 12 months in a year and different colors represented different years.

## Supplement 4: Seasonal distribution of scarlet fever cases reported in 31 provinces of China from 2004 to 2016

(N=502,723)

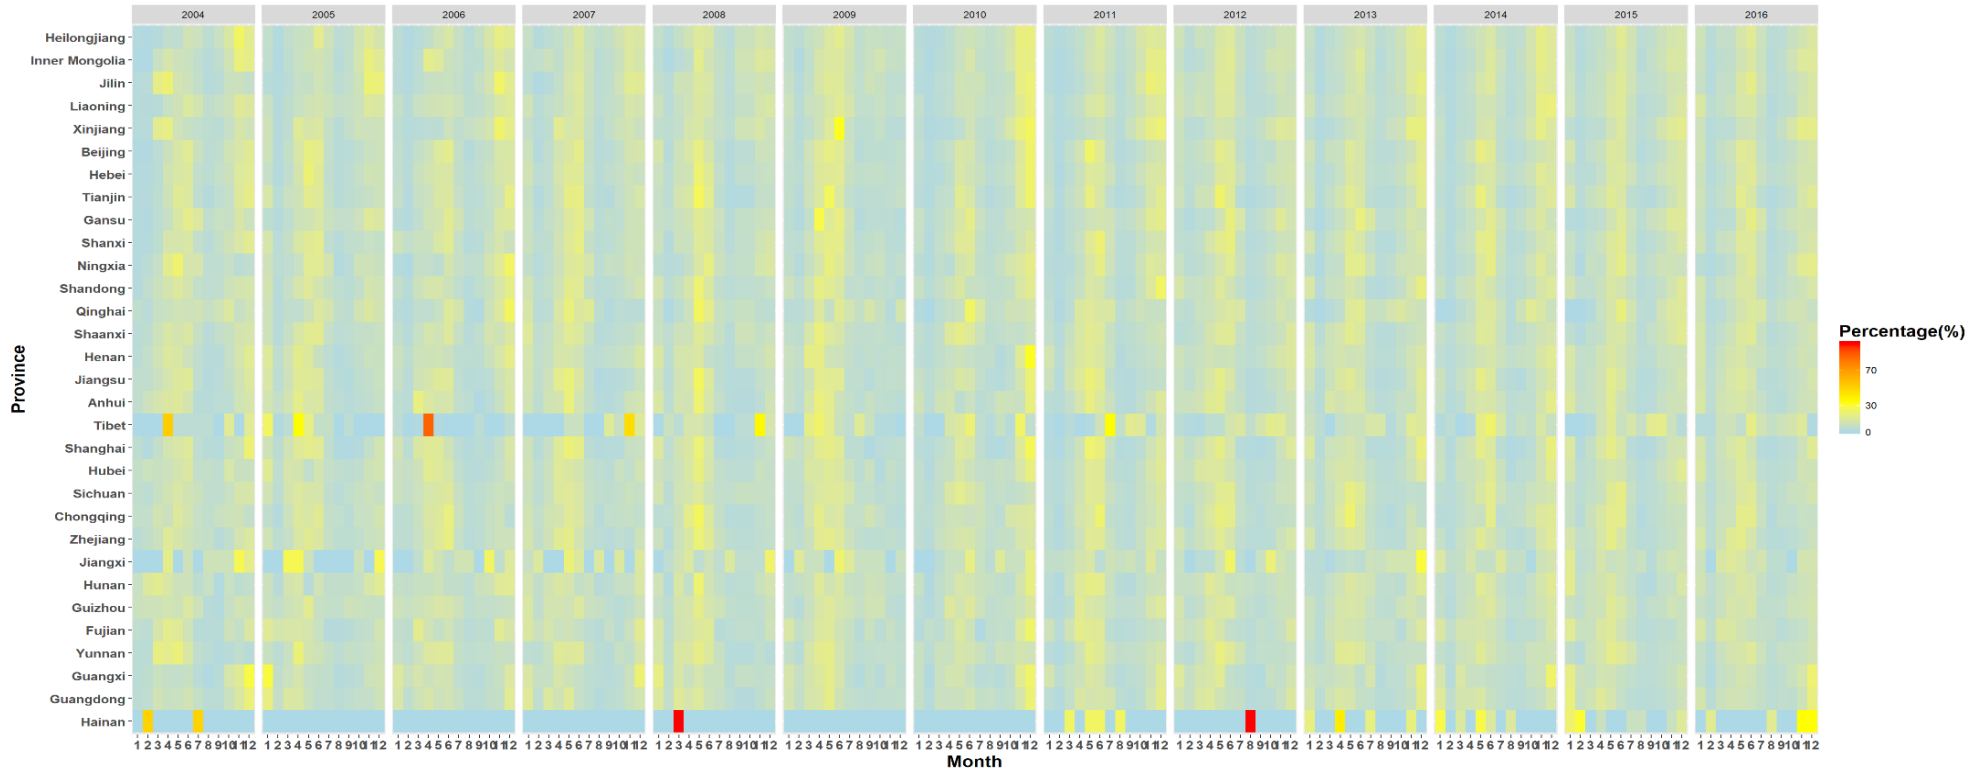

Notes: The provinces were ordered by latitude from northernmost (top) to southernmost (bottom) in the heat map. Time series of cases standardized by the proportion of annual cases. A heat map created using the gplot package in R software (<https://cran.r-project.org/web/packages/gplots/index.html>).

**Supplement 5: Estimated incidence rate ratios of different months before and after the 2011 upsurge of scarlet fever, China**

| Month     | No. of cases |             |              | Average annual incidence ( per 100 000 population) |             |              | Incidence rate ratios<br>(Post/pre-upsurge) |
|-----------|--------------|-------------|--------------|----------------------------------------------------|-------------|--------------|---------------------------------------------|
|           | Overall      | Pre-upsurge | Post-upsurge | Overall                                            | Pre-upsurge | Post-upsurge |                                             |
| January   | 37789        | 11896       | 25893        | 0.2165                                             | 0.1293      | 0.3183       | 2.46                                        |
| February  | 15624        | 5513        | 10111        | 0.0896                                             | 0.0599      | 0.1243       | 2.08                                        |
| March     | 31423        | 11896       | 19527        | 0.1805                                             | 0.1293      | 0.2403       | 1.86                                        |
| April     | 46938        | 18677       | 28261        | 0.2699                                             | 0.2030      | 0.3479       | 1.71                                        |
| May       | 70330        | 24213       | 46117        | 0.4036                                             | 0.2629      | 0.5678       | 2.16                                        |
| June      | 68651        | 23670       | 44981        | 0.3941                                             | 0.2572      | 0.5538       | 2.15                                        |
| July      | 35028        | 12241       | 22787        | 0.2011                                             | 0.1330      | 0.2805       | 2.11                                        |
| August    | 17091        | 6709        | 10382        | 0.0982                                             | 0.0728      | 0.1278       | 1.75                                        |
| September | 22744        | 8616        | 14128        | 0.1307                                             | 0.0936      | 0.1739       | 1.86                                        |
| October   | 35753        | 12669       | 23084        | 0.2054                                             | 0.1377      | 0.2843       | 2.06                                        |
| November  | 56388        | 19151       | 37237        | 0.3237                                             | 0.2082      | 0.4585       | 2.20                                        |
| December  | 64703        | 20590       | 44113        | 0.3711                                             | 0.2237      | 0.5431       | 2.43                                        |

**Supplement 6: Estimated incidence rate ratios of the age groups before and after the 2011 upsurge of scarlet fever, China**

| Age groups | No. of cases |             |              | Average annual incidence (per 100 000 population) |             |              | Incidence rate ratios<br>(Post/pre-upsurge)<br>[95% CI] |
|------------|--------------|-------------|--------------|---------------------------------------------------|-------------|--------------|---------------------------------------------------------|
|            | Overall      | Pre-upsurge | Post-upsurge | Overall                                           | Pre-upsurge | Post-upsurge |                                                         |
| 0-         | 3401         | 1599        | 1802         | 1.6573                                            | 1.3552      | 2.0098       | 1.48 (1.39-1.59 )                                       |
| 1-         | 8344         | 2399        | 5945         | 4.0141                                            | 2.1748      | 6.1599       | 2.83(2.7-2.97)                                          |
| 2-         | 16817        | 5368        | 11449        | 8.2368                                            | 4.7366      | 12.3203      | 2.60(2.52-2.69)                                         |
| 3-         | 40671        | 11398       | 29273        | 20.6481                                           | 10.1193     | 32.9318      | 3.25 (3.18-3.33)                                        |
| 4-         | 72353        | 20658       | 51695        | 38.1961                                           | 18.7518     | 60.8810      | 3.25(3.19-3.30)                                         |
| 5-         | 87567        | 26570       | 60997        | 48.7749                                           | 25.2026     | 76.2760      | 3.03(2.98-3.07)                                         |
| 6-         | 86309        | 26840       | 59469        | 49.4675                                           | 26.4598     | 76.3098      | 2.88(2.84-2.93 )                                        |
| 7-         | 64172        | 21892       | 42280        | 34.5623                                           | 21.8951     | 49.3406      | 2.25(2.22-2.29)                                         |
| 8-         | 41098        | 16239       | 24859        | 20.0628                                           | 15.5376     | 25.3422      | 1.63(1.6-1.66)                                          |
| 9-         | 24807        | 10860       | 13947        | 13.2772                                           | 9.4460      | 17.7469      | 1.88(1.83-1.93)                                         |
| 10-        | 40313        | 22123       | 18190        | 3.7532                                            | 3.1945      | 4.4051       | 1.38(1.35-1.41)                                         |
| 15-        | 8494         | 5555        | 2939         | 0.5921                                            | 0.6518      | 0.5225       | 0.80(0.77-0.84)                                         |
| 20-        | 3341         | 2039        | 1302         | 0.2261                                            | 0.2704      | 0.1744       | 0.65(0.6-0.69 )                                         |
| 25-        | 1796         | 927         | 869          | 0.1438                                            | 0.1425      | 0.1453       | 1.02(0.93-1.12)                                         |
| 30-        | 1010         | 534         | 476          | 0.0785                                            | 0.0717      | 0.0864       | 1.21(1.06-1.36 )                                        |
| 35-        | 614          | 328         | 286          | 0.0409                                            | 0.0387      | 0.0436       | 1.13(0.96-1.32)                                         |
| 40-        | 347          | 179         | 168          | 0.0237                                            | 0.0235      | 0.0240       | 1.02(0.83-1.26 )                                        |
| 45-        | 213          | 89          | 124          | 0.0169                                            | 0.0153      | 0.0189       | 1.23(0.94-1.62)                                         |
| 50-        | 156          | 66          | 90           | 0.0144                                            | 0.0110      | 0.0184       | 1.67(1.22-2.3)                                          |



|     |     |    |    |        |        |        |                   |
|-----|-----|----|----|--------|--------|--------|-------------------|
| 55- | 117 | 54 | 63 | 0.0112 | 0.0109 | 0.0115 | 1.05 (0.73-1.52 ) |
| 60- | 75  | 41 | 34 | 0.0109 | 0.0122 | 0.0095 | 0.77 (0.49-1.23 ) |
| 65- | 60  | 30 | 30 | 0.0124 | 0.0112 | 0.0138 | 1.24 (0.74-2.04 ) |
| 70- | 37  | 20 | 17 | 0.0098 | 0.0094 | 0.0104 | 1.10 (0.58-2.11 ) |
| 75- | 24  | 13 | 11 | 0.0104 | 0.0114 | 0.0084 | 0.74 (0.33-1.64)  |
| 80- | 11  | 5  | 6  | 0.0096 | 0.0103 | 0.0089 | 0.86 (0.26-2.83)  |
| >85 | 5   | 4  | 1  | 0.0254 | 0.0380 | 0.0065 | 0.17 (0.02-1.53)  |

---

**Supplement 7: Comparison of gender distribution in scarlet fever cases reported in pre-upsurge period (2004-2010) and post-upsurge period (2011-2016), China**

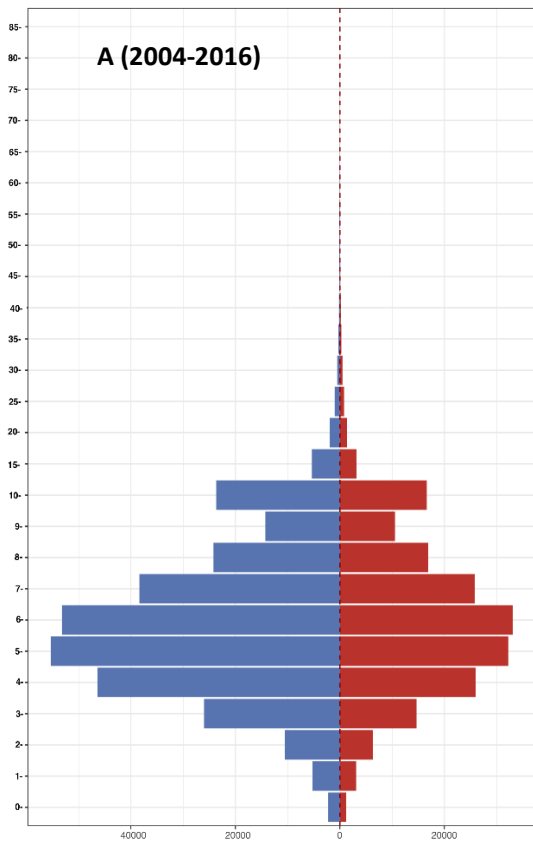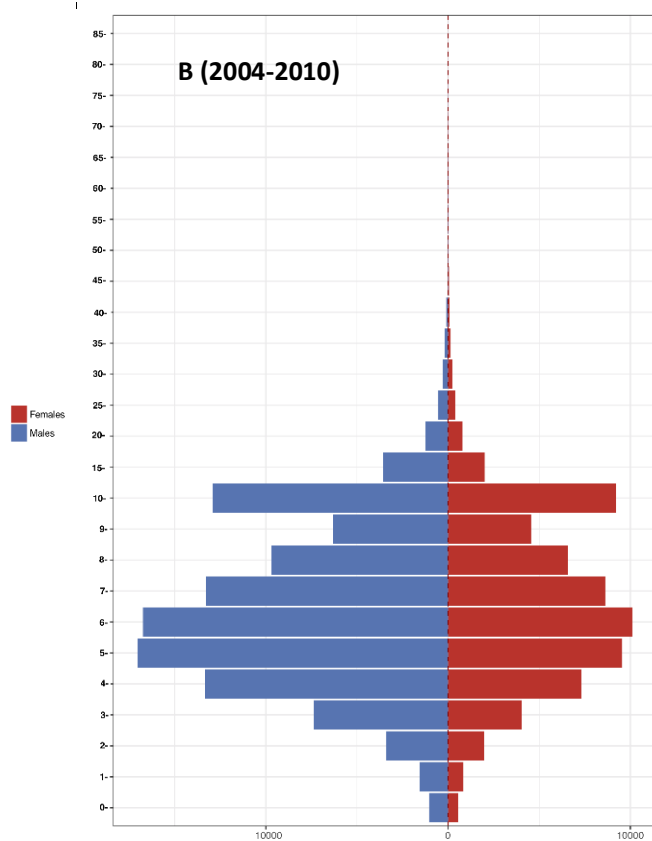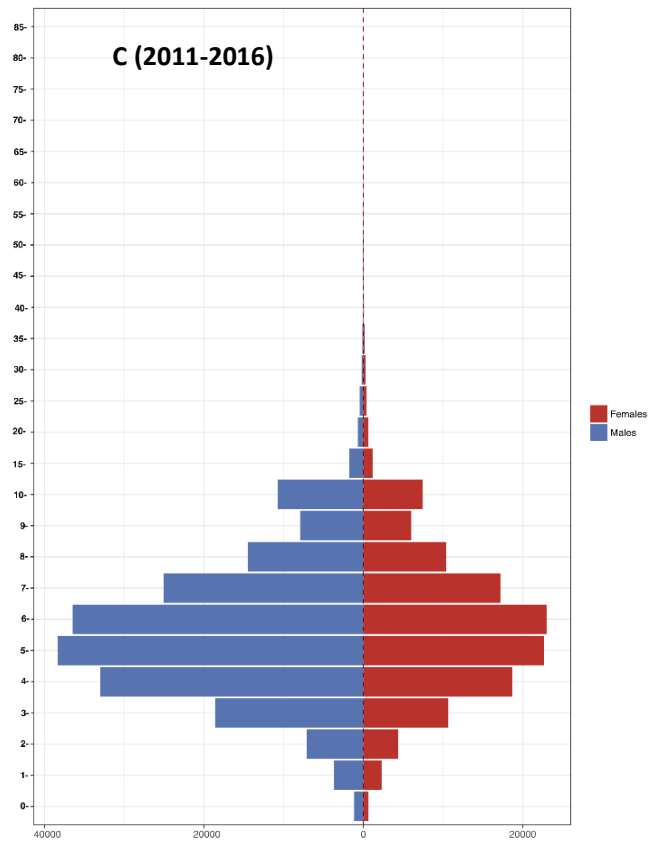

Notes: Demographic pyramid by age and sex was generated by the gplot package in R software (<https://cran.r-project.org/web/packages/gplots/index.html>)

**Supplement 8: Estimated incidence rate ratios of female and male population before and after the 2011 upsurge of scarlet fever, China**

| Age groups<br>(Years) | Average annual incidence ( per 100 000 population) |         |                    |         |              |         |                    |         | Incidence rate ratios<br>(Post/pre-upsurge) |        |
|-----------------------|----------------------------------------------------|---------|--------------------|---------|--------------|---------|--------------------|---------|---------------------------------------------|--------|
|                       | Pre-upsurge                                        |         |                    |         | Post-upsurge |         |                    |         | Male                                        | Female |
|                       | Male                                               | Female  | Sex ratio<br>(M/F) | p value | Male         | Female  | Sex ratio<br>(M/F) | p value |                                             |        |
| Overall               | 2.3036                                             | 1.4967  | 1.54               | <0.0001 | 4.8259       | 3.1873  | 1.51               | <0.0001 | 2.09                                        | 2.13   |
| 0-                    | 1.7090                                             | 0.9751  | 1.75               | <0.0010 | 2.4625       | 1.5563  | 1.58               | <0.0003 | 1.44                                        | 1.60   |
| 1-                    | 2.6930                                             | 1.6048  | 1.68               | <0.0001 | 6.7754       | 4.9400  | 1.37               | <0.0001 | 2.52                                        | 3.08   |
| 2-                    | 5.7194                                             | 3.6655  | 1.56               | <0.0001 | 13.7167      | 9.8560  | 1.39               | <0.0001 | 2.40                                        | 2.69   |
| 3-                    | 12.5155                                            | 7.4954  | 1.67               | <0.0001 | 37.5330      | 25.2274 | 1.49               | <0.0001 | 3.00                                        | 3.37   |
| 4-                    | 23.0611                                            | 13.9938 | 1.65               | <0.0001 | 68.6647      | 45.5692 | 1.51               | <0.0001 | 2.98                                        | 3.26   |
| 5-                    | 30.4353                                            | 19.2857 | 1.58               | <0.0001 | 84.0854      | 57.7952 | 1.45               | <0.0001 | 2.76                                        | 3.00   |
| 6-                    | 30.8195                                            | 21.4377 | 1.44               | <0.0001 | 80.9738      | 59.1269 | 1.37               | <0.0001 | 2.63                                        | 2.76   |
| 7-                    | 24.6351                                            | 18.7010 | 1.32               | <0.0001 | 51.2399      | 38.8757 | 1.32               | <0.0001 | 2.08                                        | 2.08   |
| 8-                    | 17.3729                                            | 13.4363 | 1.29               | <0.0001 | 26.6026      | 20.4172 | 1.30               | <0.0001 | 1.53                                        | 1.52   |
| 9-                    | 10.2197                                            | 8.5515  | 1.20               | <0.0179 | 17.0138      | 15.8544 | 1.07               | <0.0635 | 1.66                                        | 1.85   |
| 10-                   | 3.5102                                             | 2.8346  | 1.24               | <0.0001 | 4.6062       | 3.7707  | 1.22               | <0.0001 | 1.31                                        | 1.33   |
| 15-                   | 0.7941                                             | 0.4954  | 1.60               | <0.0001 | 0.5944       | 0.4158  | 1.43               | <0.0002 | 0.75                                        | 0.84   |
| 20-                   | 0.3205                                             | 0.2166  | 1.48               | <0.0003 | 0.1800       | 0.1569  | 1.15               | <0.3637 | 0.56                                        | 0.72   |

|     |        |        |      |         |        |        |      |         |      |      |
|-----|--------|--------|------|---------|--------|--------|------|---------|------|------|
| 25- | 0.1618 | 0.1225 | 1.32 | <0.1094 | 0.1525 | 0.1299 | 1.17 | <0.3913 | 0.94 | 1.06 |
| 30- | 0.0785 | 0.0646 | 1.22 | <0.5668 | 0.0821 | 0.0887 | 0.93 | <0.8143 | 1.05 | 1.37 |
| 35- | 0.0435 | 0.0338 | 1.29 | <0.4819 | 0.0396 | 0.0433 | 0.91 | <0.8633 | 0.91 | 1.28 |
| 40- | 0.0273 | 0.0195 | 1.40 | <0.4863 | 0.0239 | 0.0214 | 1.12 | <0.9370 | 0.87 | 1.10 |
| 45- | 0.0141 | 0.0166 | 0.85 | <0.9703 | 0.0202 | 0.0155 | 1.30 | <0.6972 | 1.43 | 0.93 |
| 50- | 0.0105 | 0.0116 | 0.91 | <1.0000 | 0.0222 | 0.0152 | 1.46 | <0.6917 | 2.11 | 1.32 |
| 55- | 0.0113 | 0.0107 | 1.06 | <1.0000 | 0.0133 | 0.0109 | 1.22 | <1.0000 | 1.18 | 1.02 |
| 60- | 0.0144 | 0.0115 | 1.25 | <0.7093 | 0.0085 | 0.0100 | 0.85 | <1.0000 | 0.59 | 0.86 |
| 65- | 0.0112 | 0.0112 | 1.00 | <1.0000 | 0.0118 | 0.0119 | 0.99 | <1.0000 | 1.05 | 1.06 |
| 70- | 0.0149 | 0.0096 | 1.55 | <0.9926 | 0.0130 | 0.0039 | 3.33 | <0.9926 | 0.87 | 0.41 |
| 75- | 0.0184 | 0.0097 | 1.90 | <1.0000 | 0.0151 | 0.0079 | 1.91 | <1.0000 | 0.82 | 0.82 |
| 80- | 0.0197 | 0.0120 | 1.64 | -       | 0.0112 | 0.0050 | 2.24 | <0.9182 | 0.57 | 0.41 |
| >85 | 0.0466 | 0.0321 | 1.45 | -       | 0.0171 | 0.0000 | -    | -       | 0.37 | 0.00 |

Note: “-” = no data.

**Supplement 9: Comparison of occupational distribution in the scarlet fever cases between the children (<15 years) and adults (≥ 15 years) during pre-upsurge period (2004-2010) and post-upsurge period (2011-2016) in China**

| Occupation               | Percentage of childhood cases |                               |                                 |        | Percentage of adult cases |                             |                              |        |
|--------------------------|-------------------------------|-------------------------------|---------------------------------|--------|---------------------------|-----------------------------|------------------------------|--------|
|                          | Overall (N1=18 663)           | Pre-upsurge period (n1=4 395) | Post-upsurge period (n2=14 268) | p vale | Overall period (N2=248)   | Pre-upsurge period (n3=125) | Post-upsurge period (n4=123) | p vale |
| Kindergarten             | 44.33% (8274/18663)           | 40.14% (1764/4395)            | 45.63% (6510 /14268)            | 0.0000 | -                         | -                           | -                            |        |
| Students                 | 34.76% (6487/18663)           | 34.63% (1522 /4395)           | 34.80%(4965/14268)              | 0.8381 | 25.40% (63/248)           | 30.40% (38/125)             | 20.33% (25/123)              | 00684  |
| Prenursery-aged children | 20.86% (3894/18663)           | 25.21% (1108/4395)            | 19.53% (2786/14268)             | 0.0000 | -                         | -                           | -                            |        |
| Workers                  | -                             | -                             | -                               |        | 21.77% (54/248)           | 21.60% (27/125)             | 21.95% (27/123)              | 0.9466 |
| Farmers                  | -                             | -                             | -                               |        | 17.34% (43/248)           | 10.40% (13/125)             | 24.39% (30/123)              | 0.0036 |
| Teachers                 | -                             | -                             | -                               |        | 6.05% (15/248)            | 8.00% (10/125)              | 4.07% (5/123)                | 0.1937 |
| Businesspeople           | -                             | -                             | -                               |        | 7.26% (18/248)            | 8.00% (10/125)              | 6.50% (8/123)                | 0.6498 |
| Others                   | -                             | -                             | -                               |        | 5.65% (14/248)            | 7.20% (9/125)               | 4.07% (5/123)                | 0.2848 |
| Housekeepers             | 0.01% (1/18663)               | 0.02% (1/4395)                | -                               |        | 5.24% (13/248)            | 4.00% (5/125)               | 6.50% (8/123)                | 0.3763 |
| Catering staff           | -                             | -                             | -                               |        | 1.61% (4/248)             | 3.20% (4/125)               | -                            |        |
| Officers                 | -                             | -                             | -                               |        | 3.63% (9/248)             | 2.40% (3/125)               | 4.88% (6/123)                | 0.2968 |
| Retirees                 | -                             | -                             | -                               |        | 0.81% (2/248)             | 1.60% (2/125)               | -                            |        |
| Unknown                  | 0.04% (7/18663)               | -                             | 0.05% (7/14268)                 |        | 2.42% (6/248)             | 0.80% (1/125)               | 4.07% (5/123)                | 0.0943 |
| Waiters                  | -                             | -                             | -                               |        | 0.81% (2/248)             | 0.80% (1/125)               | 0.81% (1/123)                | 0.9909 |
| Fishing (boat) people    | -                             | -                             | -                               |        | 0.40% (1/248)             | 0.80% (1/125)               | -                            |        |
| Healthcare personnel     | -                             | -                             | -                               |        | 1.61% (4/248)             | 0.80% (1/125)               | 2.44% (3/123)                | 0.3056 |

Notes: Prenursery-aged children refer to children aged 0-2 years who are taken care of by family members and/or a nanny at home. Kindergarten is a form of education for children 3-6 years old. Students refers to those over 7 years old studying in primary school through college. Healthcare personnel are individuals who provide preventive, curative, promotional or rehabilitative health care services in a systematic way to people, families or communities. “-” = no case.

**Supplement 10: Comparison of case fatality rate (CFR) and annual mortality of scarlet fever cases reported in pre-upsurge (2004-2010) and post-upsurge periods (2011-2016) in China**

| Area           | Pre-upsurge period |               |         |                                 | Post-upsurge period |               |         |                                | <i>p</i> value* |
|----------------|--------------------|---------------|---------|---------------------------------|---------------------|---------------|---------|--------------------------------|-----------------|
|                | No. of cases       | No. of deaths | CFR (%) | Annual mortality (per 100 000 ) | No. of cases        | No. of deaths | CFR (%) | Annual mortality (per 100 000) |                 |
| Overall        | 176401             | 4             | 0.0023  | 0.0001                          | 326322              | 6             | 0.0018  | 0.000112                       | 0.748           |
| Beijing        | 12269              | 0             | 0.0000  | 0                               | 21775               | 0             | 0.0000  | 0                              |                 |
| Tianjin        | 3946               | 0             | 0.0000  | 0                               | 8365                | 0             | 0.0000  | 0                              |                 |
| Hebei          | 10413              | 0             | 0.0000  | 0                               | 20059               | 0             | 0.0000  | 0                              |                 |
| Shanxi         | 7774               | 0             | 0.0000  | 0                               | 15692               | 0             | 0.0000  | 0                              |                 |
| Inner Mongolia | 9272               | 0             | 0.0000  | 0                               | 16701               | 0             | 0.0000  | 0                              |                 |
| Liaoning       | 25946              | 0             | 0.0000  | 0                               | 28734               | 1             | 0.0035  | 0.00115                        | 1.000           |
| Jilin          | 9079               | 0             | 0.0000  | 0                               | 17407               | 0             | 0.0000  | 0                              |                 |
| Heilongjiang   | 20182              | 1             | 0.0050  | 0.0013                          | 23373               | 3             | 0.0128  | 0.002603                       | 0.629           |
| Shanghai       | 4152               | 0             | 0.0000  | 0                               | 18458               | 0             | 0.0000  | 0                              |                 |
| Jiangsu        | 6488               | 0             | 0.0000  | 0                               | 12413               | 1             | 0.0081  | 0.00065                        | 1.000           |
| Zhejiang       | 4895               | 0             | 0.0000  | 0                               | 12682               | 0             | 0.0000  | 0                              |                 |
| Anhui          | 1776               | 0             | 0.0000  | 0                               | 3780                | 0             | 0.0000  | 0                              |                 |
| Fujian         | 1090               | 0             | 0.0000  | 0                               | 2546                | 0             | 0.0000  | 0                              |                 |
| Jiangxi        | 116                | 0             | 0.0000  | 0                               | 395                 | 0             | 0.0000  | 0                              |                 |
| Shandong       | 9052               | 1             | 0.0110  | 0.00055                         | 28940               | 0             | 0.0000  | 0                              | 0.238           |
| Henan          | 4773               | 0             | 0.0000  | 0                               | 8240                | 0             | 0.0000  | 0                              |                 |

|           |      |   |        |         |       |   |        |          |       |
|-----------|------|---|--------|---------|-------|---|--------|----------|-------|
| Hubei     | 1556 | 0 | 0.0000 | 0       | 4296  | 0 | 0.0000 | 0        |       |
| Hunan     | 856  | 0 | 0.0000 | 0       | 4009  | 1 | 0.0249 | 0.001516 |       |
| Guangdong | 2260 | 0 | 0.0000 | 0       | 11593 | 0 | 0.0000 | 0        |       |
| Guangxi   | 1576 | 0 | 0.0000 | 0       | 2301  | 0 | 0.0000 | 0        |       |
| Hainan    | 3    | 0 | 0.0000 | 0       | 36    | 0 | 0.0000 | 0        |       |
| Chongqing | 1868 | 0 | 0.0000 | 0       | 2945  | 0 | 0.0000 | 0        |       |
| Sichuan   | 8501 | 0 | 0.0000 | 0       | 9960  | 0 | 0.0000 | 0        |       |
| Guizhou   | 2236 | 0 | 0.0000 | 0       | 3785  | 0 | 0.0000 | 0        |       |
| Yunnan    | 5003 | 1 | 0.0200 | 0.00115 | 8608  | 0 | 0.0000 | 0        | 0.368 |
| Tibet     | 324  | 0 | 0.0000 | 0       | 467   | 0 | 0.0000 | 0        |       |
| Shaanxi   | 5436 | 0 | 0.0000 | 0       | 10114 | 0 | 0.0000 | 0        |       |
| Gansu     | 4155 | 0 | 0.0000 | 0       | 6630  | 0 | 0.0000 | 0        |       |
| Qinghai   | 1567 | 1 | 0.0638 | 0.00925 | 1685  | 0 | 0.0000 | 0        | 0.482 |
| Ningxia   | 2311 | 0 | 0.0000 | 0       | 5574  | 0 | 0.0000 | 0        |       |
| Xinjiang  | 7526 | 0 | 0.0000 | 0       | 14759 | 0 | 0.0000 | 0        |       |

Notes: CFR=case fatality ratio; \**p* values are for comparison of the CFR of scarlet fever cases reported in pre-upsurge (2004-2010) and post-upsurge periods (2011-2016), China. No significant difference was found in the annual mortality across China between pre and post upsurge period ( $p=0.953$ )

**Supplement 11: Clinical characteristics of fatal scarlet fever cases reported in pre-upsurge (2004-2010) and post-upsurge periods (2011-2016) in China**

| No. of cases | Case type                 | Sex    | Age (years) | Occupation          | Onset date | Diagnosis date | Death date | Outcome |
|--------------|---------------------------|--------|-------------|---------------------|------------|----------------|------------|---------|
| Patient 1    | Clinically diagnosed case | Male   | 15          | Farmer              | 2012/4/14  | 2012/04/17     | 2012/05/12 | Fatal   |
| Patient 2    | Clinically diagnosed case | Female | 6           | Prenursery children | 2012/06/30 | 2012/07/2      | 2012/07/2  | Fatal   |
| Patient 3    | Clinically diagnosed case | Male   | 12          | Student             | 2011/07/07 | 2011/07/11     | 2011/07/11 | Fatal   |
| Patient 4    | Probable case             | Male   | 5           | Kindergarten        | 2009/06/12 | 2009/06/16     | 2009/06/18 | Fatal   |
| Patient 5    | Clinically diagnosed case | Female | 4           | Prenursery children | 2007/01/20 | 2007/01/22     | 2007/01/25 | Fatal   |
| Patient 6    | Clinically diagnosed case | Male   | 6           | Student             | 2005/06/25 | 2005/06/25     | 2005/06/25 | Fatal   |
| Patient 7    | Clinically diagnosed case | Male   | 12          | Student             | 2015/04/20 | 2015/04/24     | 2015/04/26 | Fatal   |
| Patient 8    | Clinically diagnosed case | Female | 12          | Student             | 2005/12/09 | 2005/12/14     | 2005/12/15 | Fatal   |
| Patient 9    | Clinically diagnosed case | Male   | 4           | Prenursery children | 2013/12/25 | 2013/12/30     | 2013/12/30 | Fatal   |
| Patient 10   | -                         | -      | -           | -                   | -          | -              | -          | Fatal   |



**Supplement 12: Median days from onset to diagnosis and from onset to report date in pre-upsurge (2004-2010) and post-upsurge periods (2011-2016) between probable cases, clinically diagnosed and confirmed scarlet fever cases, China**

| Median days              | Probable cases       |                       | <i>p1</i> value* | Clinically diagnosed cases |                          |                     | <i>p2</i> value* | Confirmed cases       |        | <i>p3</i> value* |
|--------------------------|----------------------|-----------------------|------------------|----------------------------|--------------------------|---------------------|------------------|-----------------------|--------|------------------|
|                          | Pre-upsurge (n1=114) | Post-upsurge (n2=357) |                  | Pre-upsurge (n3=4 328)     | Post-upsurge (n4=13 389) | Pre-upsurge (n5=82) |                  | Post-upsurge (n6=647) |        |                  |
| From onset to diagnosis  | 2.0                  | 1.5                   | 0.013            | 2.0                        | 1.5                      | <0.001              | 3.0              | 5.0                   | <0.001 |                  |
| From onset to report     | 3.0                  | 2.0                   | 0.003            | 3.0                        | 2.0                      | <0.001              | 4.0              | 3.0                   | 0.001  |                  |
| From diagnosis to report | 1.0                  | 0.5                   | <0.001           | 1.0                        | 0.5                      | <0.001              | 1.0              | -1.0                  | <0.001 |                  |
